# Supplementary material for: Phylogenetic structure of European Salmonella Enteritidis outbreak correlates with national and international egg distribution network
Source: PubMed Central journal article supplement (PMC5320589; doi:10.1099/mgen.0.000070), 2016-08-25

| <b>ID</b>  | <b>SRA accession</b> | <b>BioSample accession</b> | <b>Source</b> | <b>Country</b> | <b>Sample Date</b> | <b>SNP Addresss (t250.t100.t50.t25.t10.t5.t0)</b> |
|------------|----------------------|----------------------------|---------------|----------------|--------------------|---------------------------------------------------|
|            | 9286 SRR1966195      | SAMN03476279               | Human         | England        | 01.05.2014         | 1.1.1.1.1.1.1                                     |
|            | 54060 SRR1958325     | SAMN03466218               | Human         | England        | 25.09.2014         | 1.1.101.174.174.174.174                           |
|            | 70666 SRR1963269     | SAMN03469728               | Human         | England        | 27.11.2014         | 1.1.105.178.254.254.254                           |
|            | 63914 SRR1967019     | SAMN03477097               | Human         | England        | 05.11.2014         | 1.1.119.217.217.217.217                           |
|            | 63932 SRR1969284     | SAMN03479361               | Human         | England        | 06.11.2014         | 1.1.122.221.221.221.221                           |
|            | 65019 SRR1966723     | SAMN03476801               | Human         | England        | 04.11.2014         | 1.1.124.226.226.226.226                           |
|            | 65407 SRR1967973     | SAMN03478064               | Human         | England        | 17.09.2014         | 1.1.127.233.233.233.233                           |
|            | 67566 SRR1965713     | SAMN03475821               | Human         | England        | 11.11.2014         | 1.1.130.237.237.237.237                           |
|            | 68689 SRR1968780     | SAMN03478878               | Human         | England        | 12.11.2014         | 1.1.131.239.239.239.239                           |
|            | 68692 SRR1965912     | SAMN03476004               | Human         | England        | 12.11.2014         | 1.1.134.242.242.242.242                           |
|            | 68696 SRR1969258     | SAMN03479335               | Human         | England        | 13.11.2014         | 1.1.135.243.243.243.243                           |
|            | 68894 SRR1959468     | SAMN03468648               | Human         | England        | 23.10.2014         | 1.1.136.244.244.244.244                           |
|            | 69702 SRR1960378     | SAMN03469111               | Human         | England        | 19.11.2014         | 1.1.138.247.247.247.247                           |
|            | 73223 SRR1967006     | SAMN03477084               | Human         | England        | 10.12.2014         | 1.1.147.263.263.263.263                           |
|            | 73535 SRR1961505     | SAMN03469160               | Human         | England        | 19.09.2014         | 1.1.148.264.264.264.264                           |
|            | 73554 SRR1963454     | SAMN03469900               | Human         | England        | 22.09.2014         | 1.1.150.266.266.266.266                           |
|            | 73611 SRR1959386     | SAMN03468543               | Human         | England        | 09.12.2014         | 1.1.151.268.268.268.268                           |
|            | 6446 SRR1969592      | SAMN03479668               | Human         | England        | 17.04.2014         | 1.1.156.275.275.275.275                           |
|            | 7410 SRR1967781      | SAMN03477871               | Human         | England        | 29.04.2014         | 1.1.157.276.276.276.276                           |
| H120540611 | SRR1646243           | SAMN03169583               | Human         | England        | 01.02.2012         | 1.1.162.286.286.286.286                           |
| H122420304 | SRR1646133           | SAMN04575166               | Human         | England        | 07.06.2012         | 1.1.168.297.297.297.297                           |
| H123740519 | SRR1645445           | SAMN03168805               | Human         | England        | 03.09.2012         | 1.1.176.315.315.315.812                           |
| H123580521 | SRR1645782           | SAMN03169047               | Human         | England        | 22.08.2012         | 1.1.177.321.321.321.321                           |
| H124680351 | SRR1635097           | SAMN03152399               | Human         | England        | 07.11.2012         | 1.1.185.343.343.343.343                           |
|            | 29960 SRR3049245     | SAMN04363532               | Human         | England        | 23.07.2014         | 1.1.191.358.363.364.366                           |
|            | 83588 SRR1966609     | SAMN03476690               | Human         | England        | 27.01.2015         | 1.1.198.484.603.644.780                           |
|            | 133214 SRR3285283    | SAMN04574820               | Human         | England        | 14.07.2015         | 1.1.2.1066.1749.2054.3119                         |

|        |            |              |       |         |            |                             |
|--------|------------|--------------|-------|---------|------------|-----------------------------|
| 13835  | SRR1968807 | SAMN03478905 | Human | England | 15.05.2014 | 1.1.2.1074.1763.2074.3174   |
| 45610  | SRR1969527 | SAMN03479604 | Human | England | 09.09.2014 | 1.1.2.137.137.137.137       |
| 48243  | SRR1958152 | SAMN03466052 | Human | England | 15.09.2014 | 1.1.2.149.149.149.149       |
| 51262  | SRR1966595 | SAMN03476676 | Human | England | 17.09.2014 | 1.1.2.167.167.167.167       |
| 53129  | SRR1969657 | SAMN03479733 | Human | England | 29.09.2014 | 1.1.2.173.173.173.173       |
| 206728 | SRR3285244 | SAMN04574798 | Human | England | 12.01.2016 | 1.1.2.197.544.2403.4325     |
| 68690  | SRR1967133 | SAMN03477223 | Human | England | 12.11.2014 | 1.1.2.240.240.240.240       |
| 13360  | SRR1965552 | SAMN03475674 | Human | England | 15.04.2014 | 1.1.2.360.368.369.3150      |
| 50150  | SRR1958578 | SAMN03466471 | Human | England | 24.09.2014 | 1.1.2.43.43.380.2290        |
| 85758  | SRR1969589 | SAMN03479665 | Human | England | 09.02.2015 | 1.1.200.491.619.660.802     |
| 80307  | SRR1959222 | SAMN03468425 | Human | England | 13.01.2015 | 1.1.202.526.680.735.915     |
| 99068  | SRR1965636 | SAMN03475749 | Human | England | 27.03.2015 | 1.1.204.580.786.862.1101    |
| 96239  | SRR1965938 | SAMN03476029 | Human | England | 16.03.2015 | 1.1.208.623.859.955.1226    |
| 95017  | SRR1968045 | SAMN03478136 | Human | England | 11.03.2015 | 1.1.212.724.1061.1193.1591  |
| 78695  | SRR1960166 | SAMN03468975 | Human | England | 24.12.2014 | 1.1.222.1001.1587.1831.2556 |
| 110976 | SRR3585376 | SAMN05173227 | Human | England | 11.05.2015 | 1.1.228.1033.1681.1946.2785 |
| 183662 | SRR3285109 | SAMN04574794 | Human | England | 27.10.2015 | 1.1.228.1033.1681.1946.4002 |
| 18531  | SRR3049367 | SAMN04363661 | Human | England | 04.06.2014 | 1.1.229.1034.1684.1954.2823 |
| 119502 | SRR3286886 | SAMN04576529 | Human | England | 02.06.2015 | 1.1.233.1044.1704.1976.2889 |
| 120575 | SRR3286870 | SAMN04576520 | Human | England | 30.04.2015 | 1.1.234.1045.1708.1982.2900 |
| 122682 | SRR3286836 | SAMN04576497 | Human | England | 12.06.2015 | 1.1.236.1049.1714.1998.2934 |
| 122699 | SRR3286863 | SAMN04576516 | Human | England | 15.06.2015 | 1.1.237.1051.1716.2001.2940 |
| 134034 | SRR3585352 | SAMN05173207 | Human | England | 08.07.2015 | 1.1.242.1065.1746.2051.3115 |
| 185901 | SRR3284689 | SAMN04574151 | Human | England | 03.11.2015 | 1.1.242.1065.1746.2051.3585 |
| 134013 | SRR3284736 | SAMN04574688 | Human | England | 15.07.2015 | 1.1.245.1070.1756.2063.3141 |
| 143553 | SRR3585347 | SAMN05173203 | Human | England | 10.08.2015 | 1.1.250.1085.1794.2122.3293 |
| 152413 | SRR3585348 | SAMN05173204 | Human | England | 25.08.2015 | 1.1.256.1101.1827.2165.3375 |
| 20903  | SRR3049061 | SAMN04363295 | Human | England | 05.06.2014 | 1.1.26.31.31.31.31          |

|            |            |              |       |         |            |                             |
|------------|------------|--------------|-------|---------|------------|-----------------------------|
| 179844     | SRR3585355 | SAMN05173209 | Human | England | 23.10.2015 | 1.1.277.1177.1995.2391.3912 |
| 185894     | SRR3585367 | SAMN05173224 | Human | England | 11.11.2015 | 1.1.280.1189.2017.2431.4023 |
| 38415      | SRR1967310 | SAMN03477400 | Human | England | 06.08.2014 | 1.1.30.99.99.99.99          |
| 31651      | SRR1968212 | SAMN03478303 | Human | England | 15.07.2014 | 1.1.34.74.74.74.74          |
| 23508      | SRR1968511 | SAMN03478604 | Human | England | 25.06.2014 | 1.1.38.47.47.47.47          |
| 9464       | SRR1966205 | SAMN03476289 | Human | England | 29.04.2014 | 1.1.4.9.9.9.9               |
| 27973      | SRR1968306 | SAMN03478397 | Human | England | 17.07.2014 | 1.1.44.59.59.59.59          |
| 197074     | SRR3284773 | SAMN04574724 | Human | England | 04.12.2015 | 1.1.47.214.1658.2500.4224   |
| 32392      | SRR1970131 | SAMN03480207 | Human | England | 25.07.2014 | 1.1.52.75.75.75.75          |
| 32527      | SRR1965330 | SAMN03475454 | Human | England | 23.07.2014 | 1.1.53.76.76.76.76          |
| 38412      | SRR1968202 | SAMN03478293 | Human | England | 06.08.2014 | 1.1.63.97.97.97.97          |
| 46122      | SRR1958664 | SAMN03466557 | Human | England | 29.08.2014 | 1.1.87.142.142.142.142      |
| 46128      | SRR1958164 | SAMN03466064 | Human | England | 29.08.2014 | 1.1.88.143.143.143.143      |
| 53076      | SRR3049354 | SAMN04363648 | Human | England | 30.09.2014 | 1.1.98.171.171.171.171      |
| 53113      | SRR1969841 | SAMN03479918 | Human | England | 29.09.2014 | 1.1.99.172.172.172.172      |
| 21065      | SRR3049778 | SAMN04364029 | Human | England | 03.06.2014 | 1.10.28.33.33.33.33         |
| H123980391 | SRR1646278 | SAMN03169618 | Human | England | 17.09.2012 | 1.11.181.335.335.335.335    |
| 21091      | SRR3048975 | SAMN04363215 | Human | England | 03.06.2014 | 1.11.31.37.37.37.37         |
| 39508      | SRR1968406 | SAMN03478497 | Human | England | 18.08.2014 | 1.11.48.106.106.106.106     |
| 39476      | SRR1969727 | SAMN03479803 | Human | England | 15.08.2014 | 1.11.67.104.104.104.104     |
| 45579      | SRR1968089 | SAMN03478180 | Human | England | 09.09.2014 | 1.11.82.135.135.135.135     |
| 34191      | SRR1968743 | SAMN03478841 | Human | England | 29.07.2014 | 1.12.55.79.79.79.79         |
| 38414      | SRR1966926 | SAMN03477004 | Human | England | 06.08.2014 | 1.12.64.98.98.98.98         |
| 41987      | SRR1965492 | SAMN03475612 | Human | England | 27.08.2014 | 1.15.61.118.118.118.118     |
| 160806     | SRR3585360 | SAMN05173219 | Human | England | 10.09.2015 | 1.2.262.1118.1850.2199.3462 |
| 180813     | SRR3285462 | SAMN04575140 | Human | England | 10.09.2015 | 1.2.262.1137.1888.2254.3602 |
| 166245     | SRR3284721 | SAMN04574534 | Human | England | 23.09.2015 | 1.2.270.1145.1898.2264.3626 |
| 13413      | SRR1969390 | SAMN03479467 | Human | England | 16.05.2014 | 1.2.3.151.151.151.3167      |

|           |            |              |              |         |            |                      |
|-----------|------------|--------------|--------------|---------|------------|----------------------|
| 9182      | SRR1967526 | SAMN03477616 | Human        | England | 07.05.2014 | 1.2.3.18.278.278.278 |
| 38425     | SRR1965692 | SAMN03475801 | Human        | England | 29.07.2014 | 1.2.3.38.38.38.1072  |
| 201405122 | SRR3410217 | SAMN04883174 | Human        | France  | 2014       | 1.2.3.38.38.38.1098  |
| 37037     | SRR1968785 | SAMN03478883 | Food         | France  | 2014       | 1.2.3.38.38.38.1098  |
| 9245      | SRR1965948 | SAMN03476039 | Human        | England | 23.04.2014 | 1.2.3.38.38.38.1098  |
| 49691     | SRR3417497 | SAMN04884709 | Human        | Austria | 2014       | 1.2.3.38.38.38.1111  |
| 23473     | SRR1966582 | SAMN03476664 | Human        | England | 13.06.2014 | 1.2.3.38.38.38.1116  |
| 37835     | SRR1966076 | SAMN03476162 | Human        | England | 28.07.2014 | 1.2.3.38.38.38.1127  |
| 62556     | SRR1958614 | SAMN03466506 | Human        | England | 29.08.2014 | 1.2.3.38.38.38.1151  |
| 43936     | SRR3049187 | SAMN04363428 | Human        | England | 21.08.2014 | 1.2.3.38.38.38.1151  |
| 40273     | SRR1968309 | SAMN03478400 | Human        | England | 12.08.2014 | 1.2.3.38.38.38.1151  |
| 34198     | SRR1967053 | SAMN03477131 | Human        | England | 24.07.2014 | 1.2.3.38.38.38.1153  |
| 40269     | SRR1965742 | SAMN03475846 | Human        | England | 09.08.2014 | 1.2.3.38.38.38.1162  |
| 37806     | SRR1970129 | SAMN03480205 | Human        | England | 30.07.2014 | 1.2.3.38.38.38.1162  |
| 24053     | SRR1965483 | SAMN03475604 | Human        | England | 19.06.2014 | 1.2.3.38.38.38.1166  |
| 39486     | SRR1966020 | SAMN03476106 | Human        | England | 04.08.2014 | 1.2.3.38.38.38.1184  |
| 37062     | SRR1965730 | SAMN03475836 | Human        | England | 06.08.2014 | 1.2.3.38.38.38.1201  |
| 54053     | SRR3417507 | SAMN04884719 | Food         | Germany | 2014       | 1.2.3.38.38.38.1255  |
| 53996     | SRR3417502 | SAMN04884714 | Food         | Germany | 2014       | 1.2.3.38.38.38.1255  |
| 38718     | SRR1967510 | SAMN03477600 | Human        | England | 07.08.2014 | 1.2.3.38.38.38.1288  |
| 23082     | SRR1969517 | SAMN03479594 | Human        | England | 08.06.2014 | 1.2.3.38.38.38.1315  |
| 43925     | SRR3049494 | SAMN04363789 | Human        | England | 13.08.2014 | 1.2.3.38.38.38.1351  |
| 57111     | SRR1968319 | SAMN03478410 | Enviromental | England | 01.08.2014 | 1.2.3.38.38.38.1365  |
| 38349     | SRR1970133 | SAMN03480209 | Human        | England | 27.07.2014 | 1.2.3.38.38.38.1378  |
| 53973     | SRR3417501 | SAMN04884713 | Food         | Germany | 2014       | 1.2.3.38.38.38.1394  |
| 62582     | SRR1957842 | SAMN03465744 | Human        | England | 02.09.2014 | 1.2.3.38.38.38.1404  |
| 48189     | SRR1957842 | SAMN03465744 | Human        | England | 02.09.2014 | 1.2.3.38.38.38.1404  |
| 45270     | SRR1957842 | SAMN03465744 | Human        | England | 02.09.2014 | 1.2.3.38.38.38.1404  |

|          |           |            |              |              |         |            |                     |
|----------|-----------|------------|--------------|--------------|---------|------------|---------------------|
|          | 58576     | SRR3049014 | SAMN04363250 | Human        | England | 28.09.2014 | 1.2.3.38.38.38.1418 |
|          | 37111     | SRR1966745 | SAMN03476823 | Human        | England | 06.08.2014 | 1.2.3.38.38.38.1431 |
|          | 54047     | SRR3417506 | SAMN04884718 | Food         | Germany | 2014       | 1.2.3.38.38.38.1438 |
|          | 21113     | SRR3049901 | SAMN04364147 | Human        | England | 04.06.2014 | 1.2.3.38.38.38.1449 |
|          | 201405757 | SRR3410219 | SAMN04883177 | Human        | France  | 2014       | 1.2.3.38.38.38.1456 |
|          | 201405756 | SRR3410218 | SAMN04883175 | Human        | France  | 2014       | 1.2.3.38.38.38.1457 |
|          | 44683     | SRR1957774 | SAMN03465669 | Human        | England | 29.08.2014 | 1.2.3.38.38.38.1469 |
|          | 42171     | SRR1968063 | SAMN03478154 | Human        | England | 26.08.2014 | 1.2.3.38.38.38.1544 |
|          | 54038     | SRR3417505 | SAMN04884717 | Food         | Germany | 2014       | 1.2.3.38.38.38.1555 |
|          | 54014     | SRR3417504 | SAMN04884716 | Food         | Germany | 2014       | 1.2.3.38.38.38.1555 |
|          | 34204     | SRR1969924 | SAMN03480001 | Human        | England | 28.07.2014 | 1.2.3.38.38.38.1595 |
|          | 46593     | SRR1969365 | SAMN03479442 | Human        | England | 15.07.2014 | 1.2.3.38.38.38.1608 |
|          | 37045     | SRR3417493 | SAMN04884705 | Human        | Austria | 2014       | 1.2.3.38.38.38.1757 |
|          | 21116     | SRR3049304 | SAMN04363598 | Human        | England | 04.06.2014 | 1.2.3.38.38.38.1775 |
|          | 43930     | SRR3049134 | SAMN04363371 | Human        | England | 14.08.2014 | 1.2.3.38.38.38.1795 |
|          | 38332     | SRR1967887 | SAMN03477978 | Human        | England | 25.07.2014 | 1.2.3.38.38.38.1809 |
|          | 31975     | SRR1968475 | SAMN03478568 | Human        | England | 25.07.2014 | 1.2.3.38.38.38.1903 |
|          | 60382     | SRR1958504 | SAMN03466397 | Human        | England | 07.10.2014 | 1.2.3.38.38.38.2034 |
|          | 32475     | SRR1969708 | SAMN03479784 | Food         | England | 17.07.2014 | 1.2.3.38.38.38.2060 |
|          | 20926     | SRR3049503 | SAMN04363796 | Human        | England | 07.06.2014 | 1.2.3.38.38.38.2103 |
| 14-05226 |           | SRR3410210 | SAMN04883165 | Enviromental | Germany | 2014       | 1.2.3.38.38.38.2115 |
|          | 73134     | SRR1966628 | SAMN03476707 | Human        | England | 01.12.2014 | 1.2.3.38.38.38.2129 |
|          | 49751     | SRR1957820 | SAMN03465716 | Human        | England | 15.09.2014 | 1.2.3.38.38.38.2163 |
|          | 56991     | SRR3049068 | SAMN04363303 | Human        | England | 30.09.2014 | 1.2.3.38.38.38.2244 |
|          | 34171     | SRR1966928 | SAMN03477006 | Human        | England | 24.07.2014 | 1.2.3.38.38.38.2245 |
|          | 65448     | SRR1965411 | SAMN03475533 | Human        | England | 03.10.2014 | 1.2.3.38.38.38.2246 |
|          | 41984     | SRR1968882 | SAMN03478980 | Human        | England | 14.08.2014 | 1.2.3.38.38.38.2248 |
|          | 37038     | SRR1969386 | SAMN03479463 | Food         | France  | 2014       | 1.2.3.38.38.38.2314 |

|          |       |            |              |       |         |            |                     |
|----------|-------|------------|--------------|-------|---------|------------|---------------------|
|          | 36531 | SRR1967772 | SAMN03477862 | Human | England | 29.07.2014 | 1.2.3.38.38.38.2321 |
|          | 43884 | SRR3049125 | SAMN04363362 | Human | England | 13.08.2014 | 1.2.3.38.38.38.2366 |
|          | 37832 | SRR1965506 | SAMN03475628 | Human | England | 31.07.2014 | 1.2.3.38.38.38.2451 |
|          | 21119 | SRR3049092 | SAMN04363328 | Human | England | 04.06.2014 | 1.2.3.38.38.38.2483 |
|          | 37807 | SRR1967170 | SAMN03477260 | Human | Wales   | 28.07.2014 | 1.2.3.38.38.38.2542 |
|          | 36522 | SRR1965772 | SAMN03475873 | Human | England | 23.07.2014 | 1.2.3.38.38.38.2621 |
|          | 54059 | SRR3417508 | SAMN04884720 | Food  | Germany | 2014       | 1.2.3.38.38.38.2623 |
|          | 68972 | SRR1966536 | SAMN03476618 | Human | England | 11.11.2014 | 1.2.3.38.38.38.2646 |
|          | 21868 | SRR3049229 | SAMN04363515 | Human | England | 11.06.2014 | 1.2.3.38.38.38.2660 |
|          | 21132 | SRR3048999 | SAMN04363239 | Human | England | 31.05.2014 | 1.2.3.38.38.38.2669 |
| 14-06388 |       | SRR3410216 | SAMN04883172 | Human | Germany | 2014       | 1.2.3.38.38.38.2797 |
| 14-06012 |       | SRR3410214 | SAMN04883170 | Human | Germany | 2014       | 1.2.3.38.38.38.2798 |
| 14-05946 |       | SRR3410213 | SAMN04883169 | Human | Germany | 2014       | 1.2.3.38.38.38.2799 |
| 14-06175 |       | SRR3410215 | SAMN04883171 | Human | Germany | 2014       | 1.2.3.38.38.38.2800 |
| 14-05795 |       | SRR3410212 | SAMN04883168 | Human | Germany | 2014       | 1.2.3.38.38.38.2801 |
|          | 56112 | SRR1966625 | SAMN03476704 | Human | England | 12.09.2014 | 1.2.3.38.38.38.354  |
|          | 53110 | SRR1965275 | SAMN03475400 | Human | England | 23.09.2014 | 1.2.3.38.38.38.354  |
|          | 49693 | SRR3417499 | SAMN04884711 | Human | Austria | 2014       | 1.2.3.38.38.38.357  |
|          | 49692 | SRR3417498 | SAMN04884710 | Human | Austria | 2014       | 1.2.3.38.38.38.357  |
|          | 37046 | SRR3417494 | SAMN04884706 | Human | Austria | 2014       | 1.2.3.38.38.38.357  |
|          | 57623 | SRR1958052 | SAMN03465953 | Human | England | 08.08.2014 | 1.2.3.38.38.38.367  |
|          | 57102 | SRR1965114 | SAMN03474010 | Human | England | 11.08.2014 | 1.2.3.38.38.38.367  |
|          | 48262 | SRR1957888 | SAMN03465790 | Human | England | 05.09.2014 | 1.2.3.38.38.38.367  |
|          | 46591 | SRR1967039 | SAMN03477117 | Human | England | 18.07.2014 | 1.2.3.38.38.38.367  |
|          | 46590 | SRR1968332 | SAMN03478423 | Human | England | 17.07.2014 | 1.2.3.38.38.38.367  |
|          | 46589 | SRR1967600 | SAMN03477690 | Human | England | 17.07.2014 | 1.2.3.38.38.38.367  |
|          | 46581 | SRR1970321 | SAMN03480397 | Human | England | 18.07.2014 | 1.2.3.38.38.38.367  |
|          | 46580 | SRR1966225 | SAMN03476308 | Human | England | 17.07.2014 | 1.2.3.38.38.38.367  |

|       |            |              |       |         |            |                    |
|-------|------------|--------------|-------|---------|------------|--------------------|
| 46579 | SRR1968486 | SAMN03478579 | Human | England | 17.07.2014 | 1.2.3.38.38.38.367 |
| 46011 | SRR1968755 | SAMN03478853 | Human | England | 09.08.2014 | 1.2.3.38.38.38.367 |
| 40799 | SRR1965168 | SAMN03474062 | Human | England | 15.08.2014 | 1.2.3.38.38.38.367 |
| 39506 | SRR1969515 | SAMN03479592 | Human | England | 08.08.2014 | 1.2.3.38.38.38.367 |
| 39455 | SRR1966692 | SAMN03476770 | Human | England | 30.07.2014 | 1.2.3.38.38.38.367 |
| 39454 | SRR1969334 | SAMN03479411 | Human | England | 28.07.2014 | 1.2.3.38.38.38.367 |
| 39453 | SRR1966194 | SAMN03476278 | Human | England | 29.07.2014 | 1.2.3.38.38.38.367 |
| 39452 | SRR1969276 | SAMN03479353 | Human | England | 28.07.2014 | 1.2.3.38.38.38.367 |
| 39450 | SRR1967179 | SAMN03477269 | Human | England | 23.07.2014 | 1.2.3.38.38.38.367 |
| 39449 | SRR1966447 | SAMN03476530 | Human | England | 21.07.2014 | 1.2.3.38.38.38.367 |
| 38766 | SRR1965590 | SAMN03475705 | Human | England | 05.08.2014 | 1.2.3.38.38.38.367 |
| 38430 | SRR1969891 | SAMN03479968 | Human | Jersey  | 01.08.2014 | 1.2.3.38.38.38.367 |
| 38426 | SRR1965596 | SAMN03475709 | Human | England | 28.07.2014 | 1.2.3.38.38.38.367 |
| 38371 | SRR1967766 | SAMN03477856 | Human | England | 28.07.2014 | 1.2.3.38.38.38.367 |
| 38369 | SRR1968929 | SAMN03479027 | Human | England | 30.07.2014 | 1.2.3.38.38.38.367 |
| 38368 | SRR3120716 | SAMN04440811 | Human | England | 31.07.2014 | 1.2.3.38.38.38.367 |
| 38361 | SRR1965359 | SAMN03475482 | Human | England | 28.07.2014 | 1.2.3.38.38.38.367 |
| 38325 | SRR1968832 | SAMN03478930 | Human | England | 30.07.2014 | 1.2.3.38.38.38.367 |
| 38318 | SRR1966486 | SAMN03476569 | Human | England | 28.07.2014 | 1.2.3.38.38.38.367 |
| 38317 | SRR1967378 | SAMN03477468 | Human | England | 28.07.2014 | 1.2.3.38.38.38.367 |
| 38316 | SRR1966755 | SAMN03476833 | Human | England | 28.07.2014 | 1.2.3.38.38.38.367 |
| 38315 | SRR1969298 | SAMN03479375 | Human | England | 28.07.2014 | 1.2.3.38.38.38.367 |
| 38314 | SRR1965369 | SAMN03475492 | Human | England | 29.07.2014 | 1.2.3.38.38.38.367 |
| 38313 | SRR1966969 | SAMN03477047 | Human | England | 28.07.2014 | 1.2.3.38.38.38.367 |
| 38311 | SRR1965464 | SAMN03475585 | Human | England | 29.07.2014 | 1.2.3.38.38.38.367 |
| 37834 | SRR1969400 | SAMN03479477 | Human | England | 31.07.2014 | 1.2.3.38.38.38.367 |
| 37833 | SRR1966923 | SAMN03477001 | Human | England | 30.07.2014 | 1.2.3.38.38.38.367 |
| 37831 | SRR1966129 | SAMN03476214 | Human | England | 30.07.2014 | 1.2.3.38.38.38.367 |

|       |            |              |       |         |            |                    |
|-------|------------|--------------|-------|---------|------------|--------------------|
| 37830 | SRR1970182 | SAMN03480258 | Human | England | 30.07.2014 | 1.2.3.38.38.38.367 |
| 37829 | SRR1969802 | SAMN03479878 | Human | England | 28.07.2014 | 1.2.3.38.38.38.367 |
| 37828 | SRR1965700 | SAMN03475808 | Human | England | 28.07.2014 | 1.2.3.38.38.38.367 |
| 37827 | SRR1968120 | SAMN03478211 | Human | England | 24.07.2014 | 1.2.3.38.38.38.367 |
| 37826 | SRR1969838 | SAMN03479915 | Human | England | 28.07.2014 | 1.2.3.38.38.38.367 |
| 37824 | SRR1970294 | SAMN03480370 | Human | England | 27.07.2014 | 1.2.3.38.38.38.367 |
| 37817 | SRR1968529 | SAMN03478622 | Human | England | 26.07.2014 | 1.2.3.38.38.38.367 |
| 37815 | SRR1969805 | SAMN03479881 | Human | England | 30.07.2014 | 1.2.3.38.38.38.367 |
| 37814 | SRR1967038 | SAMN03477116 | Human | England | 30.07.2014 | 1.2.3.38.38.38.367 |
| 37813 | SRR1968627 | SAMN03478719 | Human | England | 31.07.2014 | 1.2.3.38.38.38.367 |
| 37812 | SRR1966507 | SAMN03476590 | Human | England | 31.07.2014 | 1.2.3.38.38.38.367 |
| 37811 | SRR1968796 | SAMN03478894 | Human | England | 28.07.2014 | 1.2.3.38.38.38.367 |
| 37810 | SRR1968043 | SAMN03478134 | Human | England | 29.07.2014 | 1.2.3.38.38.38.367 |
| 37809 | SRR1967479 | SAMN03477569 | Human | England | 29.07.2014 | 1.2.3.38.38.38.367 |
| 37808 | SRR1965800 | SAMN03475898 | Human | England | 31.07.2014 | 1.2.3.38.38.38.367 |
| 37800 | SRR1968900 | SAMN03478998 | Human | England | 29.07.2014 | 1.2.3.38.38.38.367 |
| 37799 | SRR1969732 | SAMN03479808 | Human | England | 01.08.2014 | 1.2.3.38.38.38.367 |
| 37798 | SRR1969301 | SAMN03479378 | Human | England | 28.07.2014 | 1.2.3.38.38.38.367 |
| 37778 | SRR1965530 | SAMN03475652 | Human | England | 01.08.2014 | 1.2.3.38.38.38.367 |
| 36530 | SRR1969546 | SAMN03479623 | Human | England | 28.07.2014 | 1.2.3.38.38.38.367 |
| 36526 | SRR1967771 | SAMN03477861 | Human | England | 28.07.2014 | 1.2.3.38.38.38.367 |
| 36524 | SRR1967089 | SAMN03477167 | Human | England | 22.07.2014 | 1.2.3.38.38.38.367 |
| 36521 | SRR1966349 | SAMN03476432 | Human | England | 24.07.2014 | 1.2.3.38.38.38.367 |
| 36518 | SRR1969134 | SAMN03479211 | Human | England | 23.07.2014 | 1.2.3.38.38.38.367 |
| 36516 | SRR1969758 | SAMN03479834 | Human | England | 21.07.2014 | 1.2.3.38.38.38.367 |
| 36498 | SRR1966605 | SAMN03476686 | Human | England | 28.07.2014 | 1.2.3.38.38.38.367 |
| 36477 | SRR1968778 | SAMN03478876 | Other | England | 21.07.2014 | 1.2.3.38.38.38.367 |
| 36474 | SRR1969839 | SAMN03479916 | Other | England | 21.07.2014 | 1.2.3.38.38.38.367 |



|       |            |              |       |         |            |                    |
|-------|------------|--------------|-------|---------|------------|--------------------|
| 36464 | SRR1967609 | SAMN03477699 | Human | England | 25.07.2014 | 1.2.3.38.38.38.367 |
| 36395 | SRR1969024 | SAMN03479120 | Human | England | 03.08.2014 | 1.2.3.38.38.38.367 |
| 36394 | SRR1967993 | SAMN03478084 | Human | England | 04.08.2014 | 1.2.3.38.38.38.367 |
| 34199 | SRR1965044 | SAMN03473942 | Human | England | 24.07.2014 | 1.2.3.38.38.38.367 |
| 34197 | SRR1967286 | SAMN03477376 | Human | England | 24.07.2014 | 1.2.3.38.38.38.367 |
| 34196 | SRR1967185 | SAMN03477275 | Human | England | 25.07.2014 | 1.2.3.38.38.38.367 |
| 34190 | SRR3049621 | SAMN04363906 | Human | England | 24.07.2014 | 1.2.3.38.38.38.367 |
| 34189 | SRR1966851 | SAMN03476929 | Human | England | 25.07.2014 | 1.2.3.38.38.38.367 |
| 34188 | SRR1968592 | SAMN03478684 | Human | England | 25.07.2014 | 1.2.3.38.38.38.367 |
| 34187 | SRR1966252 | SAMN03476335 | Human | England | 25.07.2014 | 1.2.3.38.38.38.367 |
| 34186 | SRR1967080 | SAMN03477158 | Human | England | 25.07.2014 | 1.2.3.38.38.38.367 |
| 34182 | SRR1970179 | SAMN03480255 | Human | England | 24.07.2014 | 1.2.3.38.38.38.367 |
| 32525 | SRR1967216 | SAMN03477306 | Human | England | 18.07.2014 | 1.2.3.38.38.38.367 |
| 32472 | SRR1967085 | SAMN03477163 | Human | England | 18.07.2014 | 1.2.3.38.38.38.367 |
| 32471 | SRR1969002 | SAMN03479099 | Human | England | 20.07.2014 | 1.2.3.38.38.38.367 |
| 32470 | SRR1966685 | SAMN03476763 | Human | England | 17.07.2014 | 1.2.3.38.38.38.367 |
| 32463 | SRR1967462 | SAMN03477552 | Human | England | 17.07.2014 | 1.2.3.38.38.38.367 |
| 32462 | SRR1966087 | SAMN03476173 | Human | England | 15.07.2014 | 1.2.3.38.38.38.367 |
| 32460 | SRR1969597 | SAMN03479673 | Human | England | 16.07.2014 | 1.2.3.38.38.38.367 |
| 32459 | SRR1966830 | SAMN03476908 | Human | England | 17.07.2014 | 1.2.3.38.38.38.367 |
| 31981 | SRR1970163 | SAMN03480239 | Human | England | 25.07.2014 | 1.2.3.38.38.38.367 |
| 31980 | SRR1966240 | SAMN03476323 | Human | England | 25.07.2014 | 1.2.3.38.38.38.367 |
| 31972 | SRR1968564 | SAMN03478657 | Human | England | 25.07.2014 | 1.2.3.38.38.38.367 |
| 31968 | SRR1967858 | SAMN03477949 | Human | England | 26.07.2014 | 1.2.3.38.38.38.367 |
| 31967 | SRR1966151 | SAMN03476236 | Human | England | 26.07.2014 | 1.2.3.38.38.38.367 |
| 31966 | SRR1968746 | SAMN03478844 | Human | England | 25.07.2014 | 1.2.3.38.38.38.367 |
| 31965 | SRR1968329 | SAMN03478420 | Human | England | 25.07.2014 | 1.2.3.38.38.38.367 |
| 31929 | SRR1965679 | SAMN03475789 | Human | England | 21.07.2014 | 1.2.3.38.38.38.367 |

|       |            |              |              |         |            |                    |
|-------|------------|--------------|--------------|---------|------------|--------------------|
| 31928 | SRR1966387 | SAMN03476470 | Human        | England | 21.07.2014 | 1.2.3.38.38.38.367 |
| 31927 | SRR1970220 | SAMN03480296 | Human        | England | 22.07.2014 | 1.2.3.38.38.38.367 |
| 31923 | SRR1967548 | SAMN03477638 | Human        | England | 23.07.2014 | 1.2.3.38.38.38.367 |
| 31922 | SRR1966554 | SAMN03476636 | Human        | England | 21.07.2014 | 1.2.3.38.38.38.367 |
| 29972 | SRR3049720 | SAMN04363988 | Human        | England | 21.07.2014 | 1.2.3.38.38.38.367 |
| 29971 | SRR3049565 | SAMN04363857 | Human        | England | 21.07.2014 | 1.2.3.38.38.38.367 |
| 29970 | SRR3048933 | SAMN04363178 | Human        | England | 21.07.2014 | 1.2.3.38.38.38.367 |
| 68909 | SRR1966478 | SAMN03476561 | Human        | England | 24.06.2014 | 1.2.3.38.38.38.38  |
| 53036 | SRR3049067 | SAMN04363302 | Human        | England | 23.09.2014 | 1.2.3.38.38.38.38  |
| 31623 | SRR1968972 | SAMN03479070 | Human        | England | 09.07.2014 | 1.2.3.38.38.38.38  |
| 31613 | SRR1969753 | SAMN03479829 | Human        | England | 14.07.2014 | 1.2.3.38.38.38.38  |
| 27797 | SRR1969004 | SAMN03479101 | Human        | England | 27.06.2014 | 1.2.3.38.38.38.38  |
| 27067 | SRR1966984 | SAMN03477062 | Human        | England | 07.07.2014 | 1.2.3.38.38.38.38  |
| 25341 | SRR1965266 | SAMN03475391 | Human        | England | 25.06.2014 | 1.2.3.38.38.38.38  |
| 23493 | SRR1969003 | SAMN03479100 | Human        | England | 19.06.2014 | 1.2.3.38.38.38.38  |
| 23472 | SRR1967160 | SAMN03477250 | Human        | England | 13.06.2014 | 1.2.3.38.38.38.38  |
| 23462 | SRR1968861 | SAMN03478959 | Human        | England | 10.06.2014 | 1.2.3.38.38.38.38  |
| 21846 | SRR3049191 | SAMN04363433 | Human        | England | 09.06.2014 | 1.2.3.38.38.38.38  |
| 21845 | SRR3048579 | SAMN04362947 | Human        | England | 10.06.2014 | 1.2.3.38.38.38.38  |
| 21844 | SRR3049723 | SAMN04363991 | Human        | England | 10.06.2014 | 1.2.3.38.38.38.38  |
| 21843 | SRR3049661 | SAMN04363938 | Human        | England | 01.06.2014 | 1.2.3.38.38.38.38  |
| 21815 | SRR3049937 | SAMN04364182 | Human        | England | 09.06.2014 | 1.2.3.38.38.38.38  |
| 21810 | SRR3048785 | SAMN04363036 | Human        | England | 06.06.2014 | 1.2.3.38.38.38.38  |
| 21809 | SRR3401403 | SAMN04868780 | Enviromental | England | 08.06.2014 | 1.2.3.38.38.38.38  |
| 21807 | SRR3323014 | SAMN04601098 | Enviromental | England | 08.06.2014 | 1.2.3.38.38.38.38  |
| 21786 | SRR1966858 | SAMN03476936 | Human        | England | 03.06.2014 | 1.2.3.38.38.38.38  |
| 21785 | SRR1965313 | SAMN03475437 | Human        | England | 03.06.2014 | 1.2.3.38.38.38.38  |
| 21783 | SRR1969436 | SAMN03479513 | Human        | England | 05.06.2014 | 1.2.3.38.38.38.38  |

|       |            |              |       |         |            |                    |
|-------|------------|--------------|-------|---------|------------|--------------------|
| 21782 | SRR1968806 | SAMN03478904 | Human | England | 02.06.2014 | 1.2.3.38.38.38.38  |
| 21779 | SRR1969526 | SAMN03479603 | Human | England | 12.06.2014 | 1.2.3.38.38.38.38  |
| 21778 | SRR1966448 | SAMN03476531 | Human | England | 12.06.2014 | 1.2.3.38.38.38.38  |
| 21777 | SRR1965549 | SAMN03475671 | Human | England | 12.06.2014 | 1.2.3.38.38.38.38  |
| 21776 | SRR1967099 | SAMN03477177 | Human | England | 03.06.2014 | 1.2.3.38.38.38.38  |
| 21770 | SRR1967228 | SAMN03477318 | Human | England | 06.06.2014 | 1.2.3.38.38.38.38  |
| 21117 | SRR3049094 | SAMN04363330 | Human | England | 04.06.2014 | 1.2.3.38.38.38.38  |
| 21115 | SRR3049939 | SAMN04364183 | Human | England | 04.06.2014 | 1.2.3.38.38.38.38  |
| 21114 | SRR3049844 | SAMN04364099 | Human | England | 04.06.2014 | 1.2.3.38.38.38.38  |
| 20927 | SRR3049543 | SAMN04363836 | Human | England | 08.06.2014 | 1.2.3.38.38.38.38  |
| 20925 | SRR3049443 | SAMN04363739 | Human | England | 06.06.2014 | 1.2.3.38.38.38.38  |
| 20909 | SRR3049104 | SAMN04363341 | Human | England | 06.04.2014 | 1.2.3.38.38.38.38  |
| 18557 | SRR3048580 | SAMN04362948 | Human | England | 06.06.2014 | 1.2.3.38.38.38.38  |
| 18556 | SRR3049743 | SAMN04364003 | Human | England | 06.06.2014 | 1.2.3.38.38.38.38  |
| 18555 | SRR3049265 | SAMN04363554 | Human | England | 06.06.2014 | 1.2.3.38.38.38.38  |
| 18554 | SRR3049366 | SAMN04363660 | Human | England | 06.06.2014 | 1.2.3.38.38.38.38  |
| 21767 | SRR1967796 | SAMN03477886 | Human | England | 04.06.2014 | 1.2.3.38.38.38.38  |
| 46586 | SRR1969069 | SAMN03479163 | Human | England | 14.07.2014 | 1.2.3.38.38.38.393 |
| 46585 | SRR1966383 | SAMN03476466 | Human | England | 18.07.2014 | 1.2.3.38.38.38.393 |
| 46584 | SRR1970226 | SAMN03480302 | Human | England | 17.07.2014 | 1.2.3.38.38.38.393 |
| 46583 | SRR1969372 | SAMN03479449 | Human | England | 14.07.2014 | 1.2.3.38.38.38.393 |
| 46582 | SRR1967046 | SAMN03477124 | Human | England | 16.07.2014 | 1.2.3.38.38.38.393 |
| 39446 | SRR1970141 | SAMN03480217 | Human | England | 12.07.2014 | 1.2.3.38.38.38.393 |
| 38345 | SRR1970302 | SAMN03480378 | Human | England | 28.07.2014 | 1.2.3.38.38.38.393 |
| 38344 | SRR1968654 | SAMN03478752 | Human | England | 28.07.2014 | 1.2.3.38.38.38.393 |
| 38319 | SRR1966971 | SAMN03477049 | Human | England | 28.07.2014 | 1.2.3.38.38.38.393 |
| 37823 | SRR1965424 | SAMN03475546 | Human | England | 30.07.2014 | 1.2.3.38.38.38.393 |
| 37822 | SRR1966491 | SAMN03476574 | Human | England | 30.07.2014 | 1.2.3.38.38.38.393 |

|       |            |              |              |         |            |                    |
|-------|------------|--------------|--------------|---------|------------|--------------------|
| 37007 | SRR1969845 | SAMN03479922 | Human        | England | 01.08.2014 | 1.2.3.38.38.38.393 |
| 36525 | SRR1966937 | SAMN03477015 | Human        | England | 24.07.2014 | 1.2.3.38.38.38.393 |
| 36501 | SRR1967002 | SAMN03477080 | Human        | England | 17.07.2014 | 1.2.3.38.38.38.393 |
| 34203 | SRR1968423 | SAMN03478515 | Food         | England | 21.07.2014 | 1.2.3.38.38.38.393 |
| 34202 | SRR1967187 | SAMN03477277 | Enviromental | England | 21.07.2014 | 1.2.3.38.38.38.393 |
| 34194 | SRR1966724 | SAMN03476802 | Human        | England | 24.07.2014 | 1.2.3.38.38.38.393 |
| 34185 | SRR1967174 | SAMN03477264 | Human        | England | 22.07.2014 | 1.2.3.38.38.38.393 |
| 34184 | SRR1967383 | SAMN03477473 | Human        | England | 22.07.2014 | 1.2.3.38.38.38.393 |
| 34181 | SRR1969076 | SAMN03479169 | Human        | England | 22.07.2014 | 1.2.3.38.38.38.393 |
| 34179 | SRR1969206 | SAMN03479283 | Human        | England | 21.07.2014 | 1.2.3.38.38.38.393 |
| 34178 | SRR1966339 | SAMN03476422 | Human        | England | 17.07.2014 | 1.2.3.38.38.38.393 |
| 34177 | SRR1968906 | SAMN03479004 | Human        | England | 22.07.2014 | 1.2.3.38.38.38.393 |
| 34176 | SRR1965958 | SAMN03476049 | Human        | England | 21.07.2014 | 1.2.3.38.38.38.393 |
| 32550 | SRR1969229 | SAMN03479306 | Human        | England | 18.07.2014 | 1.2.3.38.38.38.393 |
| 32523 | SRR1965375 | SAMN03475498 | Human        | England | 15.07.2014 | 1.2.3.38.38.38.393 |
| 32478 | SRR1969172 | SAMN03479249 | Other        | England | 17.07.2014 | 1.2.3.38.38.38.393 |
| 32477 | SRR1966289 | SAMN03476372 | Food         | England | 17.07.2014 | 1.2.3.38.38.38.393 |
| 32476 | SRR1965122 | SAMN03474017 | Food         | England | 17.07.2014 | 1.2.3.38.38.38.393 |
| 32466 | SRR1967989 | SAMN03478080 | Human        | England | 18.07.2014 | 1.2.3.38.38.38.393 |
| 32375 | SRR1967533 | SAMN03477623 | Human        | England | 18.07.2014 | 1.2.3.38.38.38.393 |
| 31976 | SRR1965987 | SAMN03476078 | Human        | England | 23.07.2014 | 1.2.3.38.38.38.393 |
| 31974 | SRR1967787 | SAMN03477877 | Human        | England | 25.07.2014 | 1.2.3.38.38.38.393 |
| 31973 | SRR1966105 | SAMN03476190 | Human        | England | 22.07.2014 | 1.2.3.38.38.38.393 |
| 31652 | SRR1969601 | SAMN03479677 | Human        | England | 09.07.2014 | 1.2.3.38.38.38.393 |
| 29391 | SRR1970288 | SAMN03480364 | Human        | England | 14.07.2014 | 1.2.3.38.38.38.393 |
| 29281 | SRR3049409 | SAMN04363704 | Human        | England | 11.07.2014 | 1.2.3.38.38.38.393 |
| 29280 | SRR3049070 | SAMN04363305 | Human        | England | 11.07.2014 | 1.2.3.38.38.38.393 |
| 31612 | SRR1969738 | SAMN03479814 | Human        | England | 14.07.2014 | 1.2.3.38.38.38.394 |

|       |            |              |              |         |            |                    |
|-------|------------|--------------|--------------|---------|------------|--------------------|
| 31611 | SRR1967131 | SAMN03477221 | Human        | England | 14.07.2014 | 1.2.3.38.38.38.394 |
| 40793 | SRR1965094 | SAMN03473990 | Human        | England | 12.08.2014 | 1.2.3.38.38.38.395 |
| 91893 | SRR1968044 | SAMN03478135 | Human        | England | 01.08.2014 | 1.2.3.38.38.38.413 |
| 65449 | SRR1965735 | SAMN03475840 | Enviromental | England | 01.08.2014 | 1.2.3.38.38.38.413 |
| 57113 | SRR1966345 | SAMN03476428 | Human        | England | 05.08.2014 | 1.2.3.38.38.38.413 |
| 57112 | SRR1965784 | SAMN03475884 | Food         | England | 01.08.2014 | 1.2.3.38.38.38.413 |
| 57110 | SRR1969068 | SAMN03479162 | Enviromental | England | 01.08.2014 | 1.2.3.38.38.38.413 |
| 57103 | SRR1967394 | SAMN03477484 | Human        | England | 31.07.2014 | 1.2.3.38.38.38.413 |
| 56935 | SRR3048716 | SAMN04362990 | Human        | England | 01.08.2014 | 1.2.3.38.38.38.413 |
| 53063 | SRR1969068 | SAMN03479162 | Enviromental | England | 01.08.2014 | 1.2.3.38.38.38.413 |
| 52972 | SRR1967076 | SAMN03477154 | Human        | England | 26.09.2014 | 1.2.3.38.38.38.413 |
| 50361 | SRR1965353 | SAMN03475476 | Human        | England | 04.09.2014 | 1.2.3.38.38.38.413 |
| 50158 | SRR1958208 | SAMN03466101 | Human        | England | 20.09.2014 | 1.2.3.38.38.38.413 |
| 43909 | SRR3048844 | SAMN04363095 | Human        | England | 21.08.2014 | 1.2.3.38.38.38.413 |
| 41995 | SRR1969283 | SAMN03479360 | Human        | England | 20.08.2014 | 1.2.3.38.38.38.413 |
| 40235 | SRR1968516 | SAMN03478609 | Human        | England | 12.08.2014 | 1.2.3.38.38.38.413 |
| 40224 | SRR1968520 | SAMN03478613 | Human        | England | 13.08.2014 | 1.2.3.38.38.38.413 |
| 39514 | SRR1969190 | SAMN03479267 | Human        | England | 14.08.2014 | 1.2.3.38.38.38.413 |
| 38779 | SRR1969416 | SAMN03479493 | Human        | England | 07.08.2014 | 1.2.3.38.38.38.413 |
| 38773 | SRR1970014 | SAMN03480092 | Human        | England | 07.08.2014 | 1.2.3.38.38.38.413 |
| 38772 | SRR1966715 | SAMN03476793 | Human        | England | 06.08.2014 | 1.2.3.38.38.38.413 |
| 38422 | SRR1968589 | SAMN03478681 | Human        | England | 25.07.2014 | 1.2.3.38.38.38.413 |
| 38421 | SRR1965623 | SAMN03475736 | Human        | England | 29.07.2014 | 1.2.3.38.38.38.413 |
| 38420 | SRR1965410 | SAMN03475532 | Human        | England | 29.07.2014 | 1.2.3.38.38.38.413 |
| 38419 | SRR1967028 | SAMN03477106 | Human        | England | 29.07.2014 | 1.2.3.38.38.38.413 |
| 38418 | SRR1965458 | SAMN03475580 | Human        | England | 30.07.2014 | 1.2.3.38.38.38.413 |
| 38417 | SRR1968051 | SAMN03478142 | Human        | England | 28.07.2014 | 1.2.3.38.38.38.413 |
| 38309 | SRR1965496 | SAMN03475617 | Human        | England | 28.07.2014 | 1.2.3.38.38.38.413 |

|       |            |              |       |         |            |                    |
|-------|------------|--------------|-------|---------|------------|--------------------|
| 37819 | SRR1965533 | SAMN03475655 | Human | England | 29.07.2014 | 1.2.3.38.38.38.413 |
| 37047 | SRR3417495 | SAMN04884707 | Human | Austria | 2014       | 1.2.3.38.38.38.413 |
| 29308 | SRR3049775 | SAMN04364027 | Human | England | 15.07.2014 | 1.2.3.38.38.38.413 |
| 23057 | SRR1968791 | SAMN03478889 | Human | England | 07.06.2014 | 1.2.3.38.38.38.413 |
| 36528 | SRR1969692 | SAMN03479768 | Human | England | 28.07.2014 | 1.2.3.38.38.38.436 |
| 74309 | SRR1963071 | SAMN03469619 | Human | England | 27.11.2014 | 1.2.3.38.38.38.458 |
| 43431 | SRR1965484 | SAMN03475605 | Human | England | 29.08.2014 | 1.2.3.38.38.38.458 |
| 62574 | SRR1957852 | SAMN03465754 | Human | England | 01.09.2014 | 1.2.3.38.38.38.461 |
| 46155 | SRR3049322 | SAMN04363617 | Human | England | 27.08.2014 | 1.2.3.38.38.38.461 |
| 45262 | SRR1957814 | SAMN03465710 | Human | England | 01.09.2014 | 1.2.3.38.38.38.461 |
| 43427 | SRR1969209 | SAMN03479286 | Human | England | 28.08.2014 | 1.2.3.38.38.38.461 |
| 36506 | SRR1965669 | SAMN03475780 | Human | England | 24.07.2014 | 1.2.3.38.38.38.461 |
| 27771 | SRR1969349 | SAMN03479426 | Human | England | 26.06.2014 | 1.2.3.38.38.38.472 |
| 26644 | SRR1966029 | SAMN03476116 | Human | England | 30.06.2014 | 1.2.3.38.38.38.472 |
| 26641 | SRR1969340 | SAMN03479417 | Human | England | 26.06.2014 | 1.2.3.38.38.38.472 |
| 25320 | SRR1968299 | SAMN03478390 | Human | England | 24.06.2014 | 1.2.3.38.38.38.472 |
| 25225 | SRR1969895 | SAMN03479972 | Human | England | 28.07.2014 | 1.2.3.38.38.38.472 |
| 24987 | SRR1967540 | SAMN03477630 | Human | England | 28.06.2014 | 1.2.3.38.38.38.472 |
| 24986 | SRR1967307 | SAMN03477397 | Human | England | 28.06.2014 | 1.2.3.38.38.38.472 |
| 24039 | SRR1969015 | SAMN03479112 | Human | England | 23.06.2014 | 1.2.3.38.38.38.472 |
| 24038 | SRR1967780 | SAMN03477870 | Human | England | 23.06.2014 | 1.2.3.38.38.38.472 |
| 40794 | SRR1966307 | SAMN03476390 | Human | England | 12.08.2014 | 1.2.3.38.38.38.478 |
| 38410 | SRR1970082 | SAMN03480159 | Human | England | 01.08.2014 | 1.2.3.38.38.38.483 |
| 69743 | SRR1960032 | SAMN03468764 | Human | England | 13.11.2014 | 1.2.3.38.38.38.484 |
| 36392 | SRR1966502 | SAMN03476585 | Human | England | 04.08.2014 | 1.2.3.38.38.38.488 |
| 43927 | SRR3120707 | SAMN04440804 | Human | England | 17.08.2014 | 1.2.3.38.38.38.515 |
| 54008 | SRR3417503 | SAMN04884715 | Food  | Germany | 2014       | 1.2.3.38.38.38.533 |
| 31656 | SRR1968675 | SAMN03478773 | Human | England | 10.07.2014 | 1.2.3.38.38.38.533 |

|           |            |              |       |         |            |                    |
|-----------|------------|--------------|-------|---------|------------|--------------------|
| 34175     | SRR1968899 | SAMN03478997 | Human | England | 22.07.2014 | 1.2.3.38.38.38.537 |
| 68636     | SRR1958280 | SAMN03466173 | Human | England | 13.10.2014 | 1.2.3.38.38.38.544 |
| 66845     | SRR1958280 | SAMN03466173 | Human | England | 13.10.2014 | 1.2.3.38.38.38.544 |
| 38411     | SRR1967261 | SAMN03477351 | Human | England | 30.07.2014 | 1.2.3.38.38.38.544 |
| 36504     | SRR1966077 | SAMN03476163 | Human | England | 23.07.2014 | 1.2.3.38.38.38.544 |
| 36385     | SRR1967625 | SAMN03477715 | Human | England | 04.08.2014 | 1.2.3.38.38.38.544 |
| 32464     | SRR1967729 | SAMN03477819 | Human | England | 17.07.2014 | 1.2.3.38.38.38.544 |
| 201405760 | SRR3410220 | SAMN04883178 | Human | France  | 2014       | 1.2.3.38.38.38.550 |
| 62581     | SRR1957877 | SAMN03465779 | Human | England | 27.08.2014 | 1.2.3.38.38.38.550 |
| 62554     | SRR1958460 | SAMN03466353 | Human | England | 24.08.2014 | 1.2.3.38.38.38.550 |
| 48206     | SRR1958131 | SAMN03466031 | Human | England | 04.09.2014 | 1.2.3.38.38.38.550 |
| 48161     | SRR3049170 | SAMN04363408 | Human | England | 24.08.2014 | 1.2.3.38.38.38.550 |
| 46156     | SRR1958546 | SAMN03466439 | Human | England | 19.08.2014 | 1.2.3.38.38.38.550 |
| 46125     | SRR3048951 | SAMN04363194 | Human | England | 23.08.2014 | 1.2.3.38.38.38.550 |
| 46118     | SRR1957986 | SAMN03465888 | Human | England | 20.08.2014 | 1.2.3.38.38.38.550 |
| 46085     | SRR1958028 | SAMN03465929 | Human | England | 19.08.2014 | 1.2.3.38.38.38.550 |
| 46009     | SRR1965753 | SAMN03475855 | Human | England | 09.08.2014 | 1.2.3.38.38.38.550 |
| 45269     | SRR3049365 | SAMN04363659 | Human | England | 27.08.2014 | 1.2.3.38.38.38.550 |
| 43960     | SRR3049722 | SAMN04363990 | Human | England | 18.08.2014 | 1.2.3.38.38.38.550 |
| 43958     | SRR3049513 | SAMN04363806 | Human | England | 18.08.2014 | 1.2.3.38.38.38.550 |
| 43937     | SRR3049811 | SAMN04364054 | Human | England | 21.08.2014 | 1.2.3.38.38.38.550 |
| 41991     | SRR1969928 | SAMN03480005 | Human | England | 19.08.2014 | 1.2.3.38.38.38.550 |
| 40327     | SRR1965444 | SAMN03475566 | Human | England | 18.08.2014 | 1.2.3.38.38.38.550 |
| 40324     | SRR1967321 | SAMN03477411 | Human | England | 18.08.2014 | 1.2.3.38.38.38.550 |
| 39517     | SRR3049549 | SAMN04363842 | Human | England | 12.08.2014 | 1.2.3.38.38.38.550 |
| 39515     | SRR1967284 | SAMN03477374 | Human | England | 11.08.2014 | 1.2.3.38.38.38.550 |
| 38428     | SRR1969578 | SAMN03479655 | Human | England | 29.07.2014 | 1.2.3.38.38.38.550 |
| 31952     | SRR1965867 | SAMN03475961 | Human | England | 24.07.2014 | 1.2.3.38.38.38.550 |

|          |            |              |              |         |            |                    |
|----------|------------|--------------|--------------|---------|------------|--------------------|
| 25266    | SRR1968651 | SAMN03478749 | Human        | England | 01.07.2014 | 1.2.3.38.38.38.550 |
| 25260    | SRR1966102 | SAMN03476188 | Human        | England | 07.07.2014 | 1.2.3.38.38.38.550 |
| 25004    | SRR3049783 | SAMN04364033 | Human        | England | 03.07.2014 | 1.2.3.38.38.38.550 |
| 20929    | SRR3049502 | SAMN04363795 | Human        | England | 03.06.2014 | 1.2.3.38.38.38.550 |
| 39447    | SRR1967990 | SAMN03478081 | Human        | England | 18.07.2014 | 1.2.3.38.38.38.570 |
| 37759    | SRR1965339 | SAMN03475462 | Human        | England | 28.07.2014 | 1.2.3.38.38.38.570 |
| 61859    | SRR1967169 | SAMN03477259 | Human        | England | 10.10.2014 | 1.2.3.38.38.38.571 |
| 37036    | SRR1968931 | SAMN03479029 | Human        | France  | 2014       | 1.2.3.38.38.38.600 |
| 24040    | SRR1967283 | SAMN03477373 | Human        | England | 20.06.2014 | 1.2.3.38.38.38.604 |
| 50356    | SRR1965213 | SAMN03475345 | Human        | England | 05.09.2014 | 1.2.3.38.38.38.624 |
| 34180    | SRR1965068 | SAMN03473965 | Human        | England | 17.07.2014 | 1.2.3.38.38.38.624 |
| 31969    | SRR1965895 | SAMN03475988 | Human        | England | 25.07.2014 | 1.2.3.38.38.38.624 |
| 69699    | SRR1963272 | SAMN03469731 | Human        | England | 12.11.2014 | 1.2.3.38.38.38.653 |
| 65390    | SRR1967121 | SAMN03477211 | Human        | England | 12.09.2014 | 1.2.3.38.38.38.653 |
| 65125    | SRR1969192 | SAMN03479269 | Human        | England | 04.11.2014 | 1.2.3.38.38.38.653 |
| 62610    | SRR1958272 | SAMN03466165 | Human        | England | 30.10.2014 | 1.2.3.38.38.38.653 |
| 57130    | SRR1967597 | SAMN03477687 | Human        | England | 30.09.2014 | 1.2.3.38.38.38.653 |
| 50360    | SRR1967801 | SAMN03477891 | Human        | England | 03.09.2014 | 1.2.3.38.38.38.653 |
| 37006    | SRR1967999 | SAMN03478090 | Human        | England | 03.08.2014 | 1.2.3.38.38.38.653 |
| 65434    | SRR1968603 | SAMN03478695 | Human        | England | 30.09.2014 | 1.2.3.38.38.38.655 |
| 60074    | SRR1958676 | SAMN03466569 | Human        | England | 09.10.2014 | 1.2.3.38.38.38.655 |
| 58510    | SRR1958011 | SAMN03465913 | Human        | England | 02.10.2014 | 1.2.3.38.38.38.655 |
| 57641    | SRR1958219 | SAMN03466111 | Human        | England | 26.09.2014 | 1.2.3.38.38.38.655 |
| 52954    | SRR1965327 | SAMN03475451 | Human        | England | 25.09.2014 | 1.2.3.38.38.38.655 |
| 31917    | SRR1968213 | SAMN03478304 | Human        | England | 18.07.2014 | 1.2.3.38.38.38.668 |
| 37035    | SRR1969713 | SAMN03479789 | Human        | France  | 2014       | 1.2.3.38.38.38.673 |
| 14-05227 | SRR3410211 | SAMN04883167 | Enviromental | Germany | 2014       | 1.2.3.38.38.38.685 |
| 14-05224 | SRR3410208 | SAMN04883163 | Enviromental | Germany | 2014       | 1.2.3.38.38.38.686 |



|           |            |              |              |         |            |                                     |
|-----------|------------|--------------|--------------|---------|------------|-------------------------------------|
| 14-05225  | SRR3410209 | SAMN04883164 | Enviromental | Germany | 2014       | 1.2.3.38.38.38.687                  |
|           | 32467      | SRR1969951   | SAMN03480029 | Human   | England    | 19.07.2014 1.2.3.38.38.38.703       |
|           | 65379      | SRR1965774   | SAMN03475875 | Human   | England    | 29.09.2014 1.2.3.38.38.38.728       |
|           | 21781      | SRR1966482   | SAMN03476565 | Human   | England    | 02.06.2014 1.2.3.38.38.38.729       |
|           | 36476      | SRR1967478   | SAMN03477568 | Other   | England    | 21.07.2014 1.2.3.38.38.38.746       |
|           | 36475      | SRR1968659   | SAMN03478757 | Other   | England    | 21.07.2014 1.2.3.38.38.38.746       |
|           | 36473      | SRR1965618   | SAMN03475731 | Other   | England    | 21.07.2014 1.2.3.38.38.38.746       |
| 201405861 | SRR3410221 | SAMN04883179 | Human        | France  | 2014       | 1.2.3.38.38.38.748                  |
|           | 40795      | SRR1968912   | SAMN03479010 | Human   | England    | 15.08.2014 1.2.3.38.38.38.766       |
|           | 40274      | SRR1968614   | SAMN03478706 | Human   | England    | 11.08.2014 1.2.3.38.38.38.766       |
|           | 50109      | SRR1958033   | SAMN03465934 | Human   | England    | 16.09.2014 1.2.3.38.38.38.787       |
|           | 65373      | SRR1968069   | SAMN03478160 | Human   | England    | 02.10.2014 1.2.3.38.38.38.790       |
|           | 50104      | SRR3417500   | SAMN04884712 | Human   | Austria    | 2014 1.2.3.38.38.38.790             |
|           | 45605      | SRR3417496   | SAMN04884708 | Human   | Luxembourg | 2014 1.2.3.38.38.38.790             |
|           | 31977      | SRR1965563   | SAMN03475686 | Human   | England    | 22.04.2014 1.2.3.38.38.38.790       |
|           | 21871      | SRR3049904   | SAMN04364150 | Human   | England    | 12.06.2014 1.2.3.38.38.38.807       |
|           | 37825      | SRR1968556   | SAMN03478649 | Human   | England    | 28.07.2014 1.2.3.38.38.38.808       |
|           | 36364      | SRR1968553   | SAMN03478646 | Human   | England    | 30.07.2014 1.2.3.38.38.38.910       |
|           | 23500      | SRR1966002   | SAMN03476093 | Human   | England    | 17.06.2014 1.2.3.38.38.38.949       |
|           | 21120      | SRR3049851   | SAMN04364105 | Human   | England    | 02.06.2014 1.2.3.38.38.38.949       |
|           | 14128      | SRR1966935   | SAMN03477013 | Human   | England    | 22.05.2014 1.2.3.38.38.38.949       |
|           | 14099      | SRR1967422   | SAMN03477512 | Human   | England    | 21.05.2014 1.2.3.38.38.38.949       |
|           | 12110      | SRR1969291   | SAMN03479368 | Human   | England    | 08.05.2014 1.2.3.38.38.38.949       |
|           | 23507      | SRR1969932   | SAMN03480009 | Human   | England    | 19.06.2014 1.2.3.38.38.38.962       |
|           | 13389      | SRR1968417   | SAMN03478509 | Human   | England    | 12.05.2014 1.2.3.38.38.38.962       |
|           | 73221      | SRR1966911   | SAMN03476989 | Human   | England    | 08.12.2014 1.2.3.38.38.38.970       |
|           | 73639      | SRR1960236   | SAMN03469037 | Human   | England    | 10.12.2014 1.21.152.270.270.270.270 |
|           | 49744      | SRR1957853   | SAMN03465755 | Human   | England    | 23.09.2014 1.21.92.155.155.155.155  |

|              |            |              |       |         |            |                              |
|--------------|------------|--------------|-------|---------|------------|------------------------------|
| 66859        | SRR1958121 | SAMN03466021 | Human | England | 24.10.2014 | 1.24.129.235.235.235.235     |
| 70657        | SRR1959226 | SAMN03468429 | Human | England | 27.11.2014 | 1.25.140.251.251.251.251     |
| 71396        | SRR1959443 | SAMN03468624 | Human | England | 06.11.2012 | 1.26.144.258.258.258.258     |
| 1514         | SRR3049796 | SAMN04364040 | Human | England | 25.03.2014 | 1.27.153.271.271.271.271     |
| 170334       | SRR3285470 | SAMN04575166 | Human | England | 17.09.2015 | 1.27.225.1150.1907.2277.3665 |
| 5355         | SRR1966351 | SAMN03476434 | Human | England | 02.04.2014 | 1.3.154.272.272.272.272      |
| 104253       | SRR3286602 | SAMN04576284 | Human | England | 20.04.2015 | 1.3.224.1021.1652.1906.2677  |
| 120578       | SRR3585357 | SAMN05173211 | Human | England | 02.06.2015 | 1.3.235.1046.1710.1985.2905  |
| 146116       | SRR3285416 | SAMN04575061 | Human | England | 12.08.2015 | 1.3.249.1082.1788.2113.3276  |
| 164715       | SRR3585351 | SAMN05173206 | Human | England | 21.09.2015 | 1.3.263.1128.1873.2229.3531  |
| 9310         | SRR1968303 | SAMN03478394 | Human | England | 23.04.2014 | 1.3.6.6.6.6.6                |
| 154869       | SRR3585356 | SAMN05173210 | Human | England | 01.09.2015 | 1.47.260.1114.1845.2190.3444 |
| 62551        | SRR1957933 | SAMN03465835 | Human | England | 03.09.2014 | 1.5.112.204.204.204.204      |
| 9263         | SRR1968125 | SAMN03478216 | Human | England | 24.04.2014 | 1.5.159.280.280.280.280      |
| H122280366   | SRR1645898 | SAMN03169186 | Human | England | 29.05.2012 | 1.5.166.294.294.294.294      |
| H122540669-1 | SRR1645877 | SAMN03169165 | Human | England | 16.06.2012 | 1.5.170.299.299.299.299      |
| 83706        | SRR1969162 | SAMN03479239 | Human | England | 04.12.2014 | 1.5.192.373.396.403.786      |
| 80341        | SRR1960928 | SAMN03469143 | Human | England | 13.01.2015 | 1.5.201.507.639.686.839      |
| 80363        | SRR1960665 | SAMN03469130 | Human | England | 14.01.2015 | 1.5.205.604.822.905.1161     |
| 94103        | SRR1969779 | SAMN03479855 | Human | England | 05.03.2015 | 1.5.209.638.889.994.1289     |
| 178732       | SRR3585363 | SAMN05173221 | Human | England | 13.10.2015 | 1.5.276.1175.1987.2378.3879  |
| 183605       | SRR3585364 | SAMN05173222 | Human | England | 02.11.2015 | 1.5.279.1188.2016.2426.4013  |
| 40280        | SRR1968399 | SAMN03478490 | Human | England | 19.08.2014 | 1.5.69.111.111.111.111       |
| 40366        | SRR1968732 | SAMN03478830 | Human | England | 28.08.2014 | 1.5.72.115.115.115.115       |
| 44692        | SRR1957809 | SAMN03465705 | Human | England | 08.09.2014 | 1.5.79.129.129.129.129       |
| 45606        | SRR1965360 | SAMN03475483 | Human | England | 09.09.2014 | 1.5.83.136.136.136.136       |
| 12185        | SRR1967057 | SAMN03477135 | Human | England | 13.05.2014 | 1.5.9.11.11.11.11            |
| H123940649   | SRR1635114 | SAMN03152416 | Human | England | 21.09.2012 | 1.6.11.13.333.333.333        |

|            |        |            |              |       |         |            |                               |
|------------|--------|------------|--------------|-------|---------|------------|-------------------------------|
|            | 14875  | SRR1966084 | SAMN03476170 | Human | England | 20.05.2014 | 1.7.14.16.16.16.16            |
|            | 71409  | SRR1960073 | SAMN03468915 | Human | England | 06.11.2012 | 1.7.146.262.262.262.262       |
|            | 44755  | SRR1957732 | SAMN03465627 | Human | England | 10.09.2014 | 10.20.81.133.133.133.133      |
| H121440322 |        | SRR1645334 | SAMN03168724 | Human | England | 26.03.2012 | 13.29.164.288.288.288.288     |
|            | 193289 | SRR3585377 | SAMN05173228 | Food  | England | 02.12.2015 | 13.52.281.1202.2042.2470.4123 |
|            | 99074  | SRR3049054 | SAMN04363288 | Human | England | 27.03.2015 | 15.32.196.474.586.621.745     |
|            | 95025  | SRR1970156 | SAMN03480232 | Human | England | 11.03.2015 | 17.38.223.1020.1637.1891.2642 |
|            | 190569 | SRR3585365 | SAMN05173223 | Human | England | 24.11.2015 | 20.53.283.1206.2050.2481.4147 |
|            | 37836  | SRR1968725 | SAMN03478823 | Human | England | 05.08.2014 | 3.13.56.93.93.93.93           |
|            | 40348  | SRR1970029 | SAMN03480107 | Human | England | 28.08.2014 | 3.17.71.114.114.114.114       |
|            | 55582  | SRR1966056 | SAMN03476142 | Human | England | 19.09.2014 | 3.4.104.177.177.177.177       |
|            | 69142  | SRR1963148 | SAMN03469677 | Human | England | 13.11.2014 | 3.4.137.245.245.245.245       |
|            | 70664  | SRR1963220 | SAMN03469683 | Human | England | 27.11.2014 | 3.4.141.253.253.253.253       |
|            | 131456 | SRR3585361 | SAMN05173220 | Human | England | 08.07.2015 | 3.4.241.1063.1740.2042.3081   |
| H123480474 |        | SRR1645784 | SAMN03169050 | Human | England | 21.08.2012 | 3.4.49.318.318.318.318        |
|            | 62560  | SRR1957878 | SAMN03465780 | Human | England | 05.09.2014 | 3.4.8.205.205.205.205         |
|            | 34201  | SRR1968131 | SAMN03478222 | Human | England | 29.07.2014 | 3.4.8.81.81.81.81             |
|            | 83318  | SRR1965963 | SAMN03476054 | Human | England | 21.01.2015 | 4.31.193.423.488.506.568      |
|            | 160846 | SRR3585359 | SAMN05173214 | Human | England | 14.09.2015 | 4.31.264.1129.1875.2231.3537  |
|            | 137147 | SRR3585354 | SAMN05173208 | Human | England | 23.07.2015 | 4.44.246.1071.1757.2064.3146  |
|            | 153189 | SRR3585358 | SAMN05173212 | Human | England | 27.08.2015 | 4.45.257.1106.1833.2173.3394  |
|            | 168519 | SRR3585375 | SAMN05173226 | Human | England | 25.09.2015 | 4.50.271.1154.1912.2284.3677  |
|            | 14895  | SRR1967335 | SAMN03477425 | Human | England | 21.05.2014 | 4.8.15.17.17.17.17            |
|            | 18577  | SRR3049240 | SAMN04363526 | Human | England | 06.06.2014 | 4.9.21.24.24.24.24            |
|            | 53007  | SRR1965781 | SAMN03475881 | Human | England | 01.10.2014 | 8.14.59.168.168.168.168       |
|            | 63923  | SRR1970142 | SAMN03480218 | Human | England | 06.11.2014 | 8.23.121.220.220.220.220      |
|            | 46132  | SRR1957863 | SAMN03465765 | Human | England | 29.08.2014 | 9.16.68.108.144.144.144       |

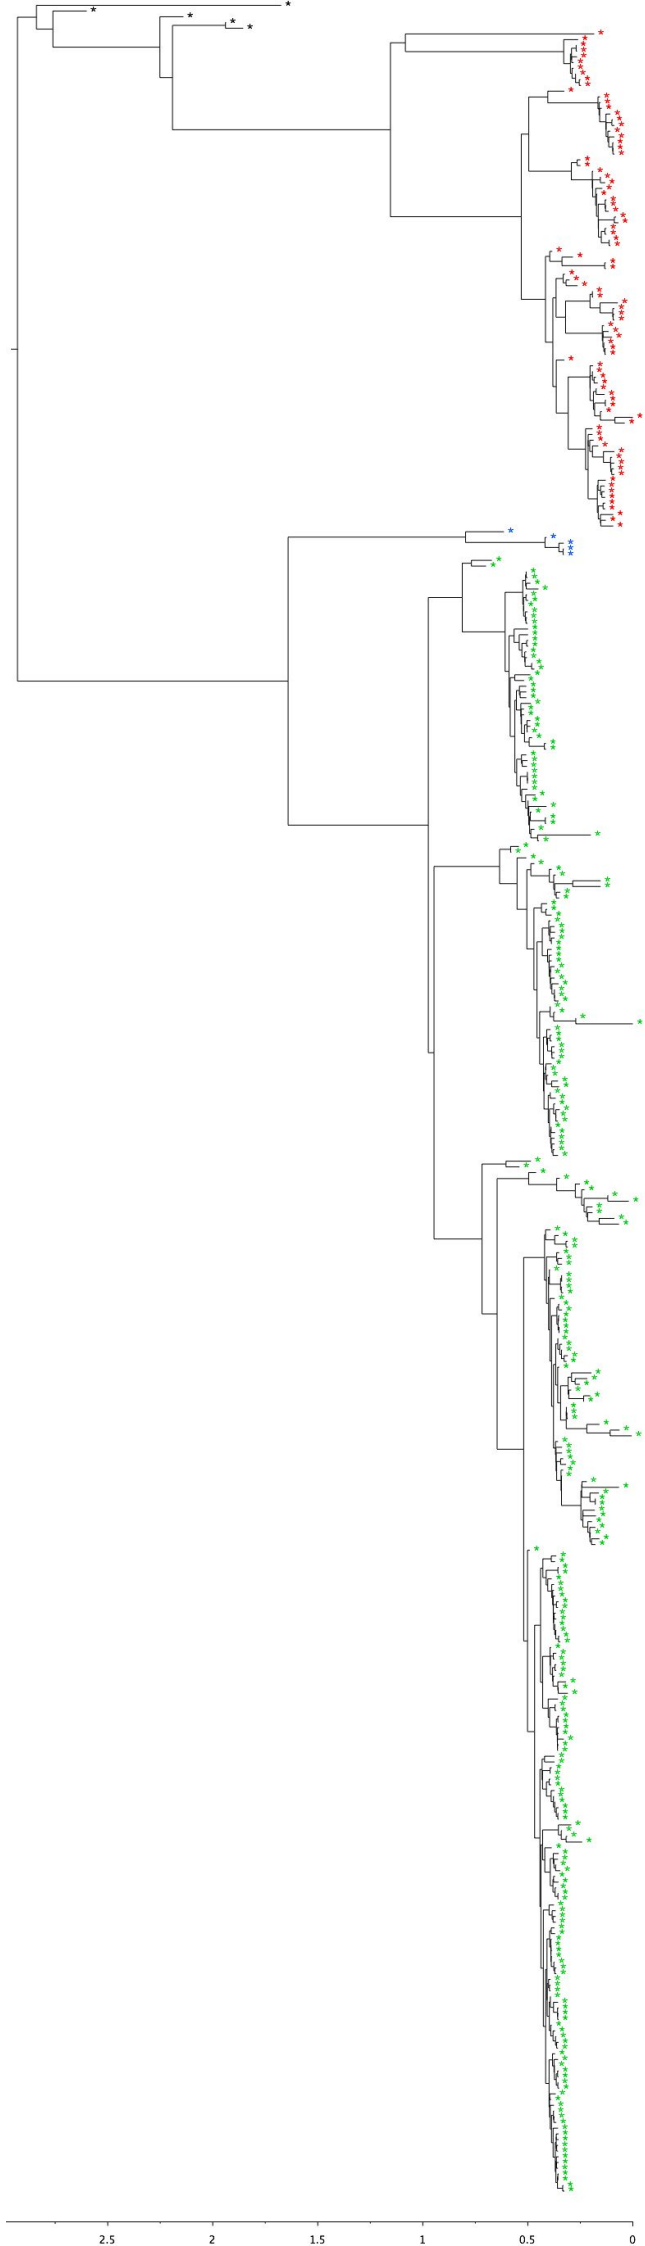

Supplement: mgen-02-70-s001.pdf [file mgen-02-70-s001.pdf]
